# Supplementary material
Source: HighWire-hosted journal article supplement (https://bjo.bmj.com/content/100/11/1455)
Supplement: inline-supplementary-material-2 [file inline-supplementary-material-2.pdf]

**Table 1: Assessment of low quality systematic reviews (SURE checklist) using SIGN checklist.**

| <b>Title</b>                                                                                                                                                         | <b>Quality assessment using SIGN checklist</b> |
|----------------------------------------------------------------------------------------------------------------------------------------------------------------------|------------------------------------------------|
| <b>The protective effect of ophthalmic viscoelastic devices on endothelial cell loss during cataract surgery: a meta-analysis using mixed treatment comparisons.</b> | Reject                                         |
| <b>EBO Technical review of the validity of the recommendation 14 of the clinical practice guidelines for the management of cataract among adults.</b>                | Reject                                         |
| <b>Use of herbal medicines and nutritional supplements in ocular disorders.</b>                                                                                      | Reject                                         |
| <b>Blindness and visual impairment in the Americas and the Caribbean.</b>                                                                                            | Reject                                         |
| <b>Systematic review of population-based studies of the prevalence of cataracts.</b>                                                                                 | Reject                                         |
| <b>Elimination of avoidable blindness due to cataract: where do we prioritize and how should we monitor this decade?</b>                                             | Low quality                                    |
| <b>Endophthalmitis outbreaks following cataract surgery: Causative organisms, etiologies, and visual acuity outcomes.</b>                                            | Reject                                         |
| <b>Bacterial Endophthalmitis Prophylaxis for Cataract Surgery. An Evidence-based Update.</b>                                                                         | Reject                                         |
| <b>Vitrectomy Timing for Retained Lens Fragments After Surgery for Age-Related Cataracts: A Systematic Review and Meta-Analysis.</b>                                 | Reject                                         |
| <b>Gender and the use of cataract surgical services in developing countries.</b>                                                                                     | Low quality                                    |
| <b>Acute endophthalmitis following cataract surgery: a systematic review of the literature.</b>                                                                      | Low quality                                    |
| <b>Cataract surgical coverage remains lower in women.</b>                                                                                                            | Reject                                         |
| <b>Environmental tobacco smoke exposure and eye disease.</b>                                                                                                         | Reject                                         |
| <b>Smoking and risk of age-related cataract: a meta-analysis.</b>                                                                                                    | Low quality                                    |
| <b>Evidence for the use of nutritional supplements and herbal medicines in common eye diseases.</b>                                                                  | Reject                                         |
| <b>A systematic overview of the incidence of posterior capsule opacification.</b>                                                                                    | Reject                                         |
| <b>Cataracts in India: Current Situation, Access, and Barriers to Services Over Time.</b>                                                                            | Reject                                         |
| <b>Peri-operative management of ophthalmic patients taking antithrombotic therapy.</b>                                                                               | Reject                                         |
| <b>Supplementary intracameral lidocaine for phacoemulsification under topical anesthesia. A meta-analysis of randomized controlled trials.</b>                       | Low quality                                    |
| <b>Efficacy and costs of ambulatory cataract surgery: a systematic review.</b>                                                                                       | Low quality                                    |

|                                                                                                                                                                  |             |
|------------------------------------------------------------------------------------------------------------------------------------------------------------------|-------------|
| <b>Meta-analysis comparing same-day versus delayed vitrectomy clinical outcomes for intravitreal retained lens fragments after age-related cataract surgery.</b> | Reject      |
| <b>Gender and use of cataract surgical services in developing countries.</b>                                                                                     | Low quality |

**Table 1.2: Assessment of medium quality systematic reviews (SURE checklist) using SIGN checklist.**

| <b>Title</b>                                                                                                                                                                    | <b>Quality assessment using SIGN checklist</b> |
|---------------------------------------------------------------------------------------------------------------------------------------------------------------------------------|------------------------------------------------|
| <b>Association of blood antioxidants and vitamins with risk of age-related cataract: a meta-analysis of observational studies.</b>                                              | Acceptable                                     |
| <b>Postoperative pain after cataract surgery.</b>                                                                                                                               | Rejected                                       |
| <b>Dose-response relationship of inhaled corticosteroids and cataracts: a systematic review and meta-analysis.</b>                                                              | Acceptable                                     |
| <b>Medical prophylaxis and treatment of cystoid macular edema after cataract surgery. The results of a meta-analysis.</b>                                                       | Rejected                                       |
| <b>Synthesis of the literature on visual acuity and complications following cataract extraction with intraocular lens implantation. Cataract Patient Outcome Research Team.</b> | Rejected                                       |
| <b>Effectiveness of cataract surgery in reducing driving-related difficulties: a systematic review and meta-analysis.</b>                                                       | High quality                                   |
| <b>Phacoemulsification versus manual small-incision cataract surgery for age-related cataract: meta-analysis of randomized controlled trials.</b>                               | Acceptable                                     |
| <b>Synthesis of the literature on the effectiveness of regional anesthesia for cataract surgery.</b>                                                                            | acceptable                                     |
| <b>Topical anesthesia versus regional anesthesia for cataract surgery: a meta-analysis of randomized controlled trials.</b>                                                     | acceptable                                     |
| <b>Effect of heparin-surface-modified intraocular lenses on posterior capsular opacification: Meta-analysis of randomized clinical trial.</b>                                   | Article written in Chinese                     |
| <b>Effect of technique on intraocular pressure after combined cataract and glaucoma surgery: An evidence-based review.</b>                                                      | acceptable                                     |
| <b>Use of Global Visual Acuity Data in a time trade-off approach to calculate the cost utility of cataract surgery.</b>                                                         | Rejected                                       |

**Table 1.3: Assessment of high quality systematic reviews (SURE checklist) using SIGN checklist.**

| <b>Title</b>                                                                                                                                                                                                    | <b>Quality assessment using SIGN checklist</b> |
|-----------------------------------------------------------------------------------------------------------------------------------------------------------------------------------------------------------------|------------------------------------------------|
| <b>Antioxidant vitamin supplementation for preventing and slowing the progression of age-related cataract.</b>                                                                                                  | High                                           |
| <b>Day care versus in-patient surgery for age-related cataract.</b>                                                                                                                                             | High                                           |
| <b>Surgical interventions for age-related cataract.</b>                                                                                                                                                         | High                                           |
| <b>Effect of intraocular lens design on posterior capsule opacification.</b>                                                                                                                                    | High                                           |
| <b>Interventions for preventing posterior capsule opacification.</b>                                                                                                                                            | High                                           |
| <b>Risk Factors for Acute Endophthalmitis following Cataract Surgery: A Systematic Review and Meta-Analysis.</b>                                                                                                | Acceptable                                     |
| <b>Perioperative antibiotics for prevention of acute endophthalmitis after cataract surgery.</b>                                                                                                                | High                                           |
| <b>Routine preoperative medical testing for cataract surgery.</b>                                                                                                                                               | High                                           |
| <b>Surgery for cataracts in people with age-related macular degeneration.</b>                                                                                                                                   | High                                           |
| <b>Effect of AcrySof versus silicone or polymethyl methacrylate intraocular lens on posterior capsule opacification.</b>                                                                                        | High                                           |
| <b>Manual small incision cataract surgery (MSICS) with posterior chamber intraocular lens versus extracapsular cataract extraction (ECCE) with posterior chamber intraocular lens for age-related cataract.</b> | High                                           |
| <b>Multifocal versus monofocal intraocular lenses after cataract extraction.</b>                                                                                                                                | High                                           |
| <b>Peribular versus retrobulbar anaesthesia for cataract surgery.</b>                                                                                                                                           | High                                           |
| <b>Vision improvement and reduction in falls after expedited cataract surgery Systematic review and meta-analysis.</b>                                                                                          | High                                           |
